# Supplementary material
Source: PubMed Central journal article supplement (PMC3292294)
Supplement: cr2011199x1.pdf [file cr2011199x1.pdf]

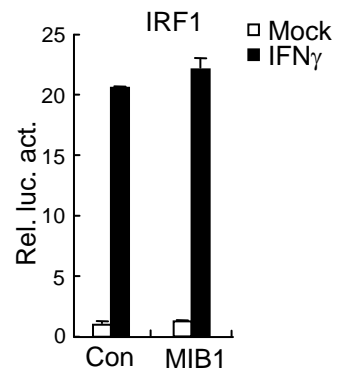

**Figure S1.** MIB1 dose not activate IFN $\gamma$ -induced activation of IRF1 promoter. 293 cells ( $1 \times 10^5$ ) were transfected with IRF1 promoter reporter plasmid (0.1  $\mu$ g) together with a control or MIB1 expression plasmid (0.1  $\mu$ g). Twenty-four hours after transfection, cells were left untreated or treated with IFN $\gamma$  (100 ng/ml) for 8 hr before luciferase assays were performed.
