# Supplementary material
Source: PubMed Central journal article supplement (PMC3292294)
Supplement: cr2011199x2.pdf [file cr2011199x2.pdf]

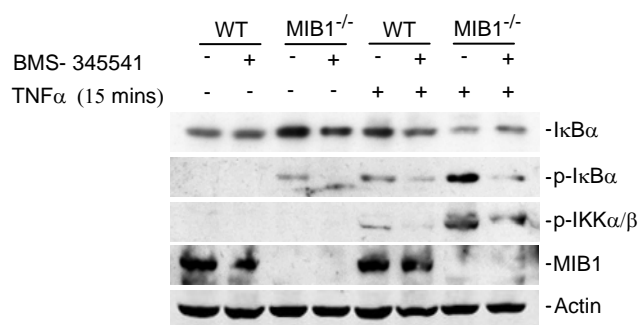

**Figure S2.** The Effect of IKK inhibitor on the function of MIB1. Wild-type or *MIB1*<sup>-/-</sup> HCT116 cells ( $5 \times 10^5$ ) were treated with BMS-345541 (10  $\mu$ M) for 3 hr or left untreated, and then treated with TNF $\alpha$  (20 ng/ml) for 15 mins or left untreated before collection of cells. The cell lysates were analyzed by immunoblot with the indicated antibodies.
