# Supplementary material
Source: PubMed Central journal article supplement (PMC3292294)
Supplement: cr2011199x3.pdf [file cr2011199x3.pdf]

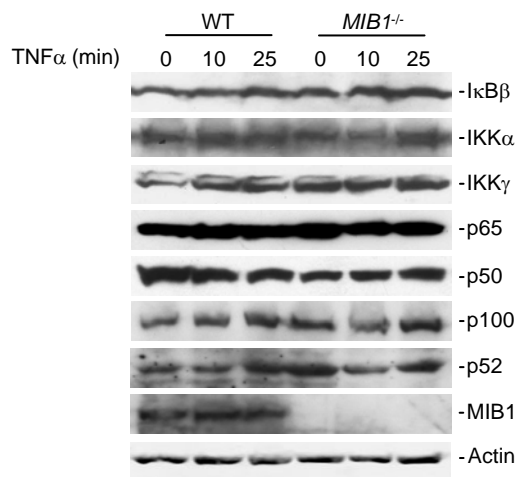

**Figure S3.** Immunoblot analysis of various components in NF- $\kappa$ B signaling pathways in wild-type and MIB1<sup>-/-</sup> HCT116 cells. Wild-type or MIB1<sup>-/-</sup> HCT116 cells ( $4 \times 10^5$ ) were treated with TNF $\alpha$  (20 ng/ml) for the indicated time or left untreated. The cell lysates were analyzed by immunoblot with the indicated antibodies.
