# Supplementary material
Source: PubMed Central journal article supplement (PMC3292294)
Supplement: cr2011199x4.pdf [file cr2011199x4.pdf]

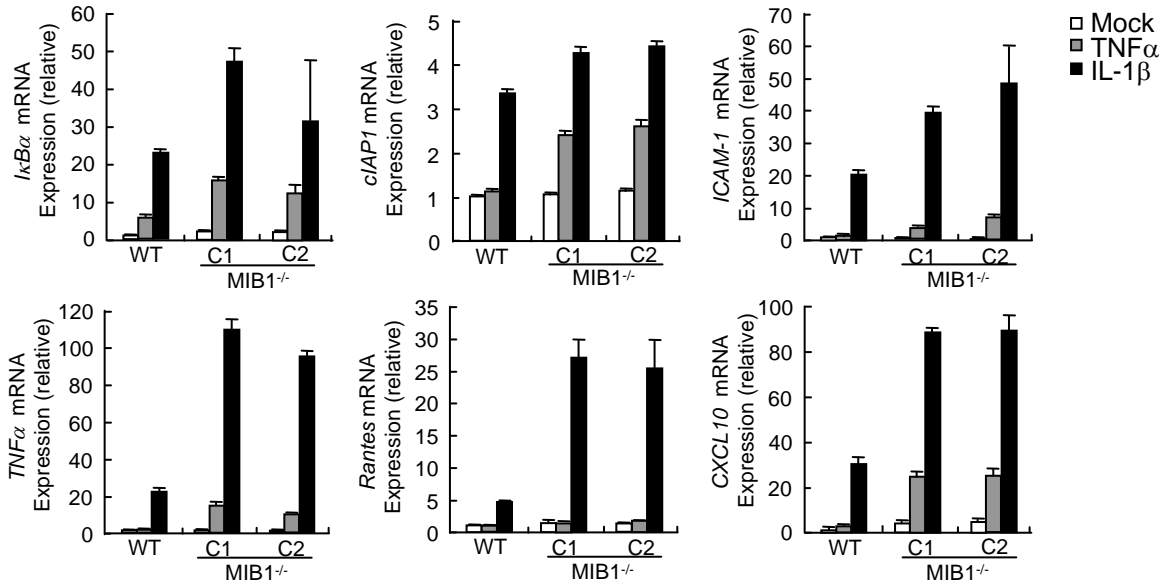

**Figure S4.** The effects of MIB1 deficiency on basal and TNF $\alpha$  or IL1 $\beta$ -induced transcription of *IkB $\alpha$*  and other NF- $\kappa$ B target genes. Wild-type or *MIB1*<sup>-/-</sup> HCT116 cells ( $1 \times 10^6$ ) were treated with TNF $\alpha$  (20 ng/ml) or IL-1 $\beta$  (20 ng/ml) for 4 hr or left untreated. Transcription of *IkB $\alpha$* , *cIAP1*, *ICAM1*, *TNF $\alpha$* , *Rantes*, *CXCL10* was measured by quantitative real-time PCR. The results were normalized to *GAPDH* transcription.
