# Supplementary material
Source: PubMed Central journal article supplement (PMC3292294)
Supplement: cr2011199x5.pdf [file cr2011199x5.pdf]

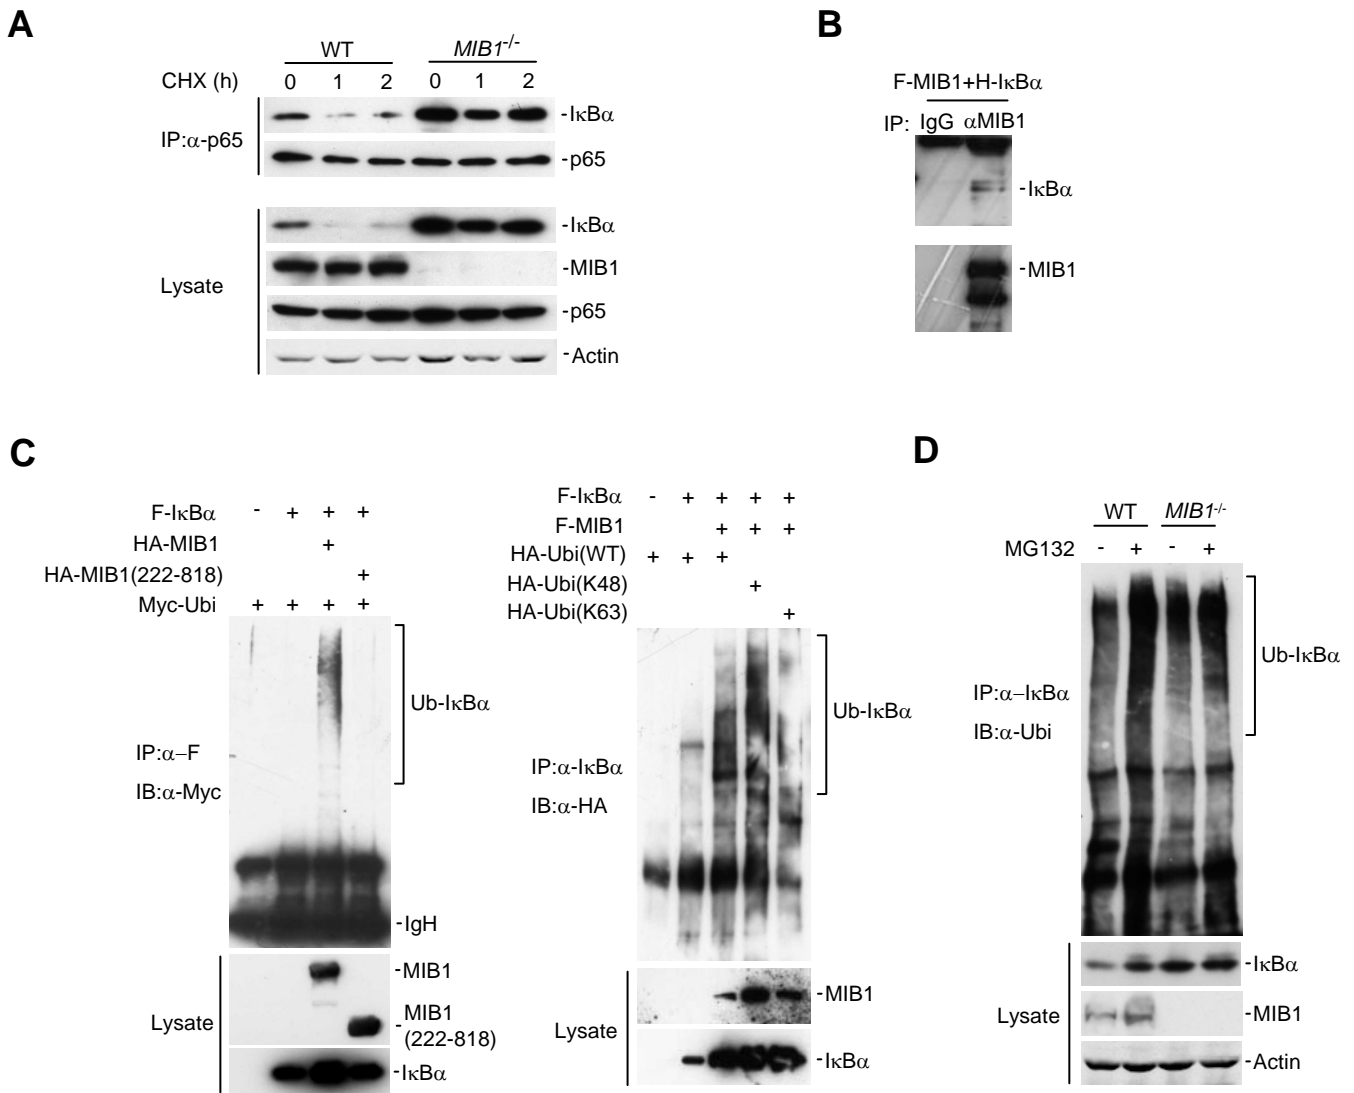

**Figure S5. MIB1 mediates ubiquitination of IκBα.**

(A) The amount of p65-bound IκBα was increased in *MIB1*<sup>-/-</sup> cells. The indicated cells ( $4 \times 10^5$ ) were treated with MG132 (50 μM) for the indicated times or left untreated. Cell lysates were immunoprecipitated with anti-p65. The immunoprecipitates were analyzed by immunoblot with anti-p65 or anti-IκBα. The expression levels of the endogenous proteins were detected with the indicated antibodies.

(B) MIB1 is associated with IκBα. 293 cells ( $1 \times 10^6$ ) were transfected with the indicated plasmids (5 μg each). Twenty-four hr after transfection, the cell lysates were immunoprecipitated with control mouse IgG or anti-MIB1. The immunoprecipitates were analyzed by immunoblot with anti-IκBα (upper panel) or anti-MIB1 (lower panel).

(C) MIB1 causes the ubiquitination of IκBα. 293 cells ( $1 \times 10^6$ ) were transfected with the indicated plasmids. Twenty-four hr after transfection, immunoprecipitation and immunoblots were performed with the indicated antibodies. The expression levels of the transfected proteins were examined with anti-HA or anti-Flag.

(D) Knockout of MIB1 impairs the ubiquitination of endogenous IκBα. Wild-type or *MIB1*<sup>-/-</sup> HCT116 cells ( $5 \times 10^7$ ) were treated with MG132 (50 μM) for 4 hr or left untreated. Cell lysates were immunoprecipitated with anti-IκBα. The immunoprecipitates were analyzed by immunoblots with anti-ubiquitin. The expression levels of the endogenous proteins were detected by immunoblots with the indicated antibodies.
